# Supplementary material for: Cross-sectional associations between lunch-type consumed on a school day and British adolescents’ overall diet quality
Source: PubMed Central journal article supplement — Prev Med Rep. 2020 May 28;19:101133. doi: 10.1016/j.pmedr.2020.101133 (PMC7334820; doi:10.1016/j.pmedr.2020.101133), 2020-05-28
Supplement: mmc1.pdf [file mmc1.pdf]

Supplemental figure 1 A Directed Acyclic Graph (DAG) with type of lunch consumed on a school day as the main exposure and Diet quality index and its components and sub-components as the outcome with prediction of potential confounding variables.

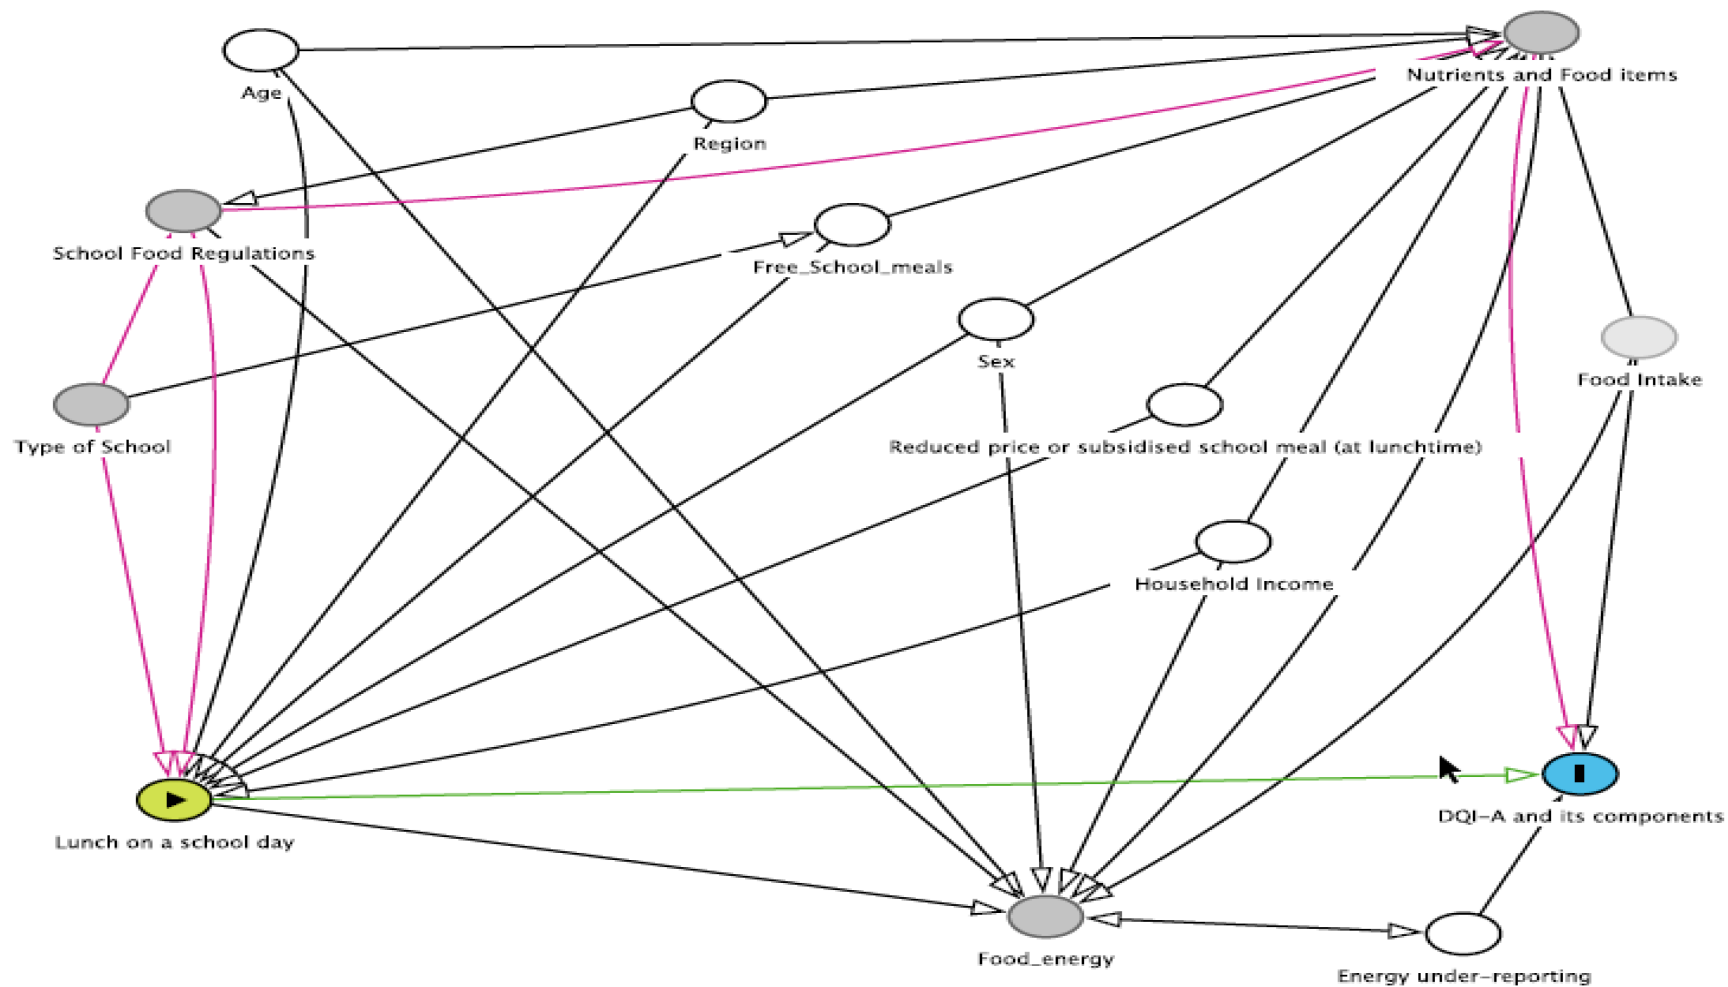

**Supplemental figure 2 The mean score of overall DQI-A%, and percentage of consumption for each type of lunch consumed on a school day over smoothed survey years (Year 1-8).**

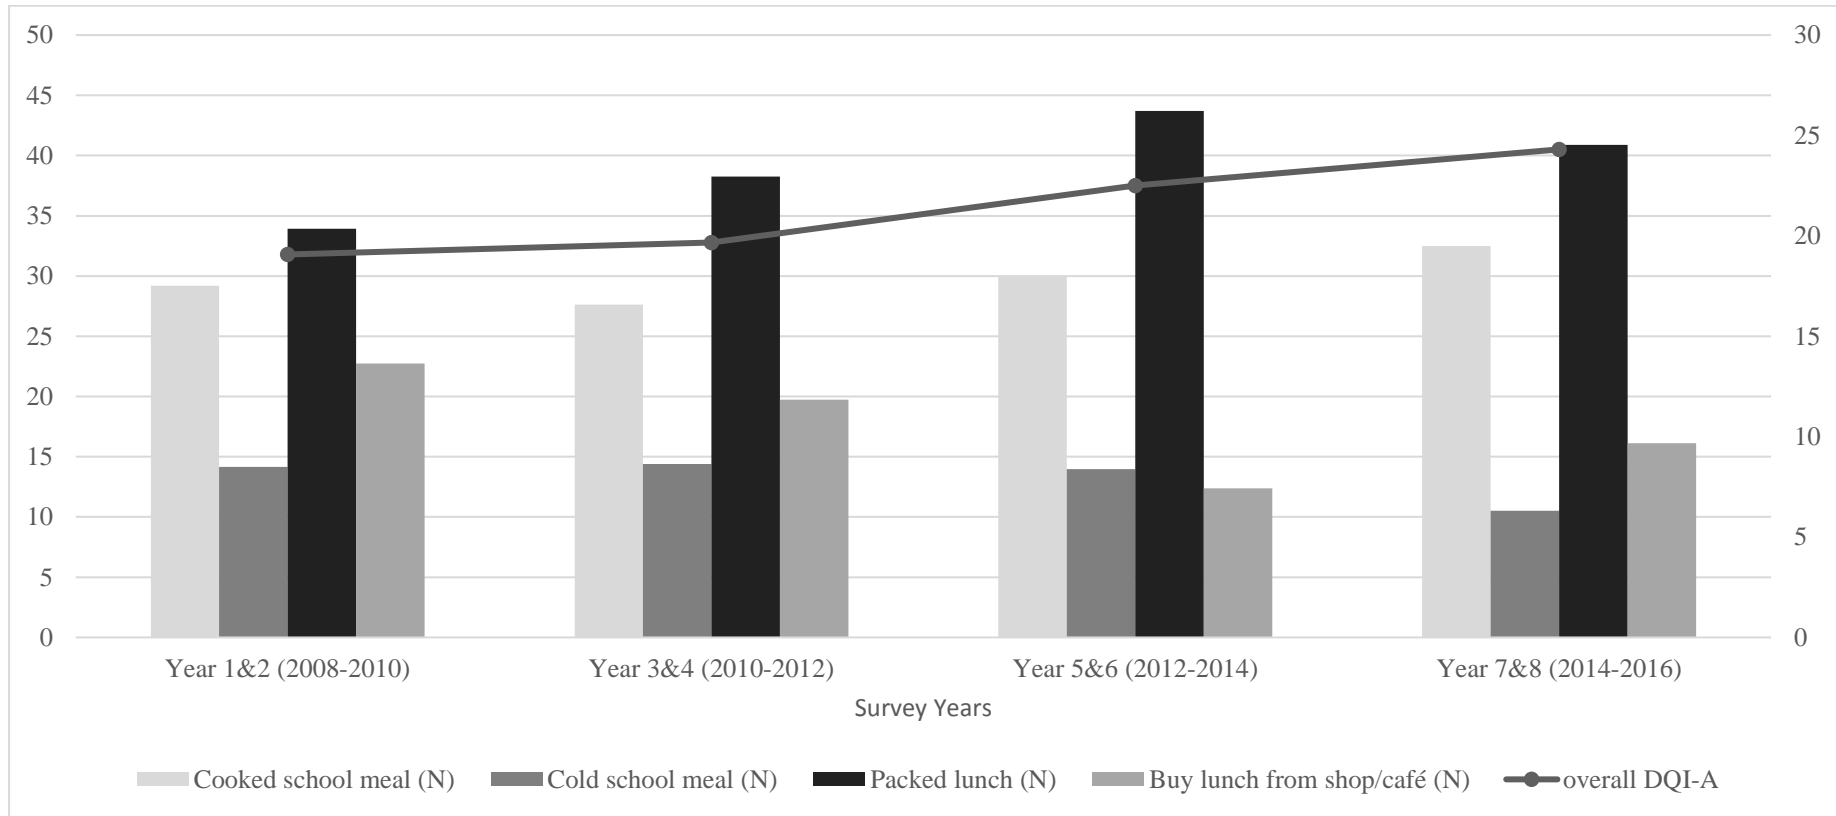

**Supplemental Table 1 Regression (clustered) analysis between Diet quality index and its components and subcomponents and type of lunch consumed on a school day for younger adolescents aged 11-14 years from the NDNS rolling programme.**

| Unadjusted analysis |                  |        |     |                          |        |      |                          |        |       |               |        |       |                  |        |     |     |      |       |      |      |
|---------------------|------------------|--------|-----|--------------------------|--------|------|--------------------------|--------|-------|---------------|--------|-------|------------------|--------|-----|-----|------|-------|------|------|
|                     | Cold school meal |        |     | Packed lunch (from home) |        |      | Buy lunch from shop/cafe |        |       | Lunch at home |        |       | Do not eat lunch |        |     |     |      |       |      |      |
|                     | B                | 95% CI | P   | B                        | 95% CI | P    | B                        | 95% CI | P     | B             | 95% CI | P     | B                | 95% CI | P   |     |      |       |      |      |
| <b>DQI-A %</b>      | -2.0             | -4.5   | 0.6 | 0.1                      | -0.4   | -2.4 | 1.7                      | 0.72   | -8.4  | -11.6         | -5.2   | <0.01 | -6.5             | -16.7  | 3.7 | 0.2 | -3.6 | -14.0 | 6.9  | 0.5  |
| <b>DQc %</b>        | -5.5             | -11.1  | 0.0 | 0.1                      | -2.9   | -7.2 | 1.3                      | 0.2    | -16.9 | -23.8         | -10.0  | <0.01 | -15.0            | -33.3  | 3.4 | 0.1 | -7.9 | -27.4 | 11.6 | 0.43 |
| <b>DDc %</b>        | -0.3             | -2.5   | 1.9 | 0.8                      | 0.6    | -1.1 | 2.3                      | 0.49   | -5.0  | -7.7          | -2.3   | <0.01 | -2.7             | -11.3  | 5.8 | 0.5 | -1.8 | -10.5 | 6.8  | 0.68 |
| <b>DEc %</b>        | -0.1             | -1.4   | 1.3 | 0.9                      | 1.2    | 0.1  | 2.3                      | 0.03   | -3.3  | -5.1          | -1.6   | <0.01 | -1.8             | -7.5   | 4.0 | 0.5 | -0.9 | -6.5  | 4.6  | 0.7  |
| <b>DAx %</b>        | 0.6              | -1.3   | 2.5 | 0.6                      | 1.8    | 0.3  | 3.2                      | 0.02   | -3.1  | -5.4          | -0.7   | 0.01  | -2.5             | -9.8   | 4.7 | 0.5 | -0.6 | -6.9  | 5.7  | 0.86 |
| <b>DEx %</b>        | 0.5              | -0.8   | 1.9 | 0.4                      | 0.2    | -0.7 | 1.2                      | 0.6    | 0.8   | -0.7          | 2.4    | 0.3   | -0.3             | -4.6   | 4.0 | 0.9 | 0.5  | -2.5  | 3.4  | 0.75 |

**CI, Confidence Interval; DQI-A, Diet Quality Index for Adolescents; DQc, Diet quality component; DDc, Diet diversity component; DEc, Diet equilibrium component; DAx, Diet adequacy sub-component; DEx, Diet excess sub-component**

**Supplemental Table 2 Regression (clustered) analysis between Diet quality index and its components and subcomponents and type of lunch consumed on a school day for older adolescents aged 15-18 years from the NDNS rolling programme.**

| Unadjusted analysis |                  |        |      |                          |        |      |                          |        |       |               |        |       |                  |        |      |     |      |       |      |       |
|---------------------|------------------|--------|------|--------------------------|--------|------|--------------------------|--------|-------|---------------|--------|-------|------------------|--------|------|-----|------|-------|------|-------|
|                     | Cold school meal |        |      | Packed lunch (from home) |        |      | Buy lunch from shop/cafe |        |       | Lunch at home |        |       | Do not eat lunch |        |      |     |      |       |      |       |
|                     | B                | 95% CI | P    | B                        | 95% CI | P    | B                        | 95% CI | P     | B             | 95% CI | P     | B                | 95% CI | P    |     |      |       |      |       |
| <b>DQI-A %</b>      | -0.6             | -4.0   | 2.8  | 0.7                      | 4.7    | 2.1  | 7.2                      | <0.01  | -6.6  | -9.2          | -3.9   | <0.01 | 1.8              | -3.3   | 6.8  | 0.5 | -2.3 | -9.5  | 4.9  | 0.5   |
| <b>DQc %</b>        | 0.6              | -6.7   | 7.8  | 0.9                      | 8.1    | 3.0  | 13.3                     | <0.01  | -11.8 | -17.3         | -6.2   | <0.01 | 4.6              | -7.2   | 16.3 | 0.4 | 1.9  | -13.9 | 17.6 | 0.82  |
| <b>DDc %</b>        | -1.8             | -4.5   | 1.0  | 0.2                      | 2.7    | 0.5  | 4.9                      | 0.02   | -4.9  | -7.3          | -2.6   | <0.01 | 1.2              | -2.6   | 5.0  | 0.5 | -7.9 | -13.0 | -2.7 | <0.01 |
| <b>DEc %</b>        | -0.6             | -2.3   | 1.1  | 0.5                      | 3.2    | 1.8  | 4.6                      | <0.01  | -3.0  | -4.4          | -1.5   | <0.01 | -0.5             | -2.9   | 1.9  | 0.7 | -0.9 | -4.1  | 2.3  | 0.6   |
| <b>DAx %</b>        | -2.4             | -4.7   | -0.1 | 0.04                     | 1.9    | 0.1  | 3.7                      | 0.04   | -4.5  | -6.5          | -2.6   | <0.01 | -1.3             | -4.5   | 1.8  | 0.4 | -7.4 | -10.9 | -3.9 | <0.01 |
| <b>DEx %</b>        | -1.4             | -3.0   | 0.3  | 0.1                      | -1.6   | -2.9 | -0.4                     | <0.01  | -0.7  | -2.1          | 0.6    | 0.3   | -0.6             | -2.7   | 1.5  | 0.6 | -5.2 | -7.9  | -2.4 | <0.01 |

**CI, Confidence Interval; DQI-A, Diet Quality Index for Adolescents; DQc, Diet quality component; DDc, Diet diversity component; DEc, Diet equilibrium component; DAx, Diet adequacy sub-component; DEx, Diet excess sub-component**
